# Supplementary material for: CO2-in-PEG emulsion-templating synthesis of poly(acrylamide) with controllable porosity and their use as efficient catalyst supports
Source: Royal Society of Chemistry journal article supplement (doi:10.1039/c6ra04897h), 2016-01-01
Supplement: c6ra04897h1.pdf [file c6ra04897h1.pdf]

**Supplementary Information for**  
**CO<sub>2</sub>-in-PEG emulsion-templating synthesis of poly(acrylamide)s with**  
**controllable porosity and their use as efficient catalyst supports**

Zhimin Xue,<sup>a\*</sup> Weihong Chang,<sup>a</sup> Yan Cheng,<sup>b</sup> Jing Liu,<sup>b</sup> Jian Li,<sup>b</sup> Wancheng Zhao<sup>c</sup> and Tiancheng Mu<sup>c\*</sup>

*<sup>a</sup> Beijing Key Laboratory of Lignocellulosic Chemistry, College of Materials Science and Technology, Beijing Forestry University, Beijing 100083, China. Email: [zmxue@bjfu.edu.cn](mailto:zmxue@bjfu.edu.cn)*

*<sup>b</sup> Key Laboratory of TCM Quality Control Technology, Shandong Analysis and Test Center, 250014 Jinan, China.*

*<sup>c</sup> Department of Chemistry, Renmin University of China, Beijing 100872, China. Tel: 86-10-62514925, Email: [tcmu@ruc.edu.cn](mailto:tcmu@ruc.edu.cn)*

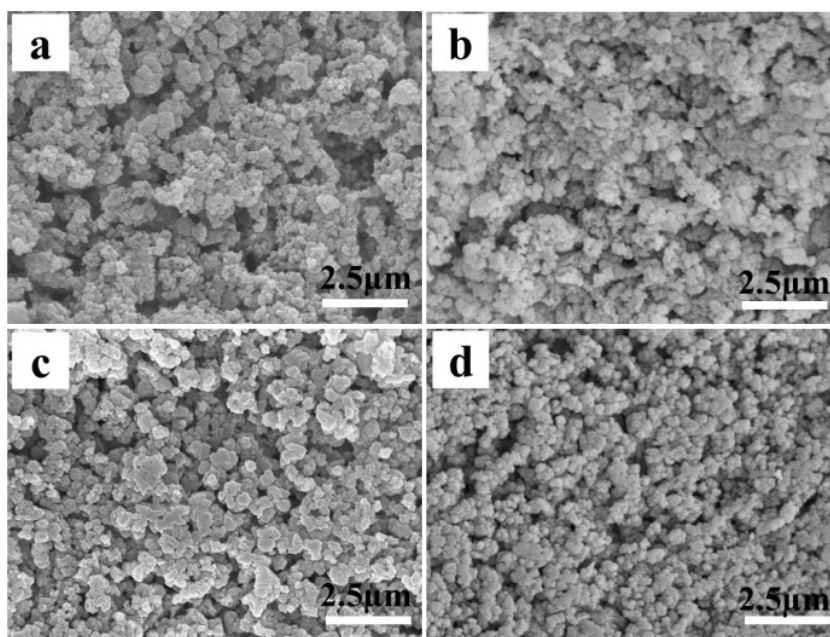

**Fig. S1.** SEM images of polymer synthesized in CO<sub>2</sub>-in-PEG emulsion at 8.0 MPa (a), 10.0 MPa (b), 12.0 MPa (c) and 14.0 MPa (d).

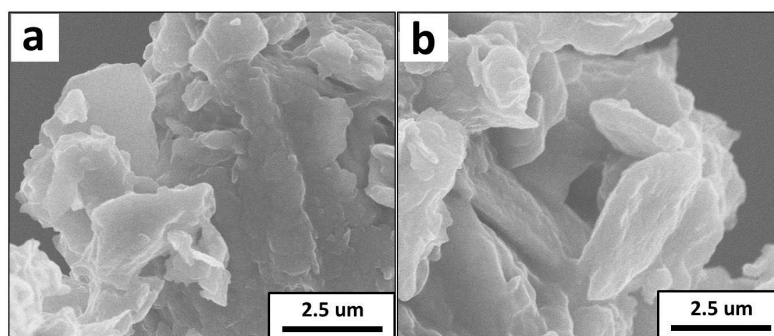

**Fig. S2.** SEM images of polymer synthesized in PEG alone (a) or the system of PEG and P104 (b) in the absence of CO<sub>2</sub>.

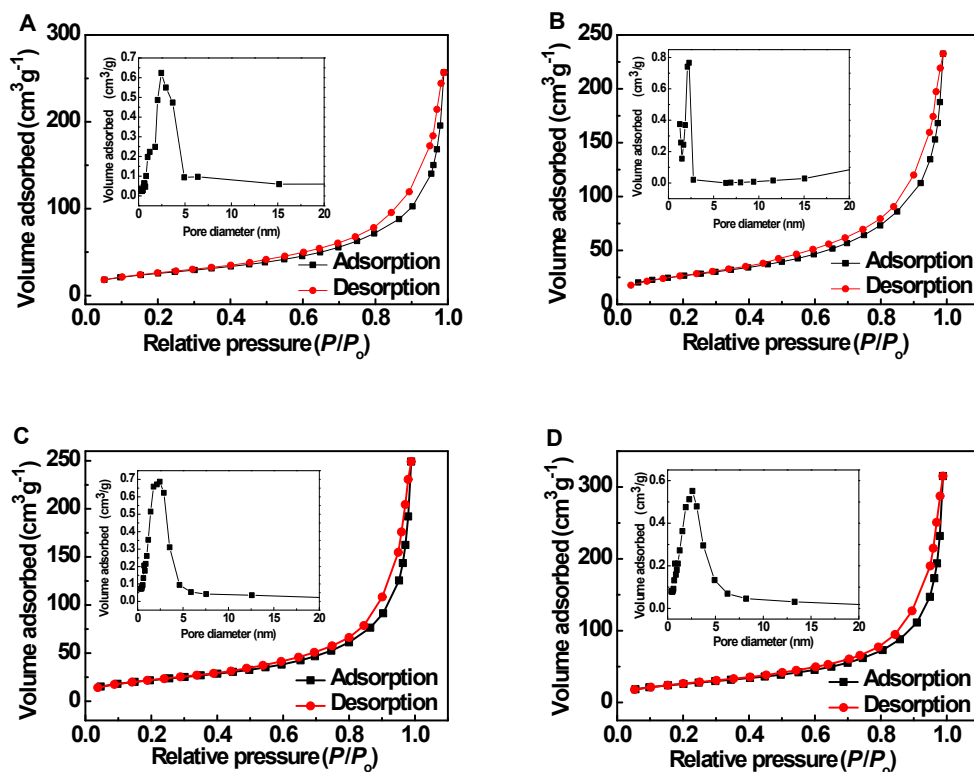

**Fig. S3.** Mesoporous size distribution of the PAM synthesized at 8 MPa (A), 10 MPa (B), 12 MPa (C) and 14 MPa (D). The inset graphics were the pore size distribution calculated using BJH model.

**Table S1** Effect of pressure on the porosity, the total macropore volume ( $V_{\text{pore}}$ ), median macropore diameter ( $D_{\text{macro}}$ ), BET surface area ( $S_{\text{BET}}$ ), total pore volume ( $V_{\text{t}}$ ) and mesopore diameter ( $D_{\text{meso}}$ ) of PAM synthesized in  $\text{CO}_2$ -in-PEG emulsion.

| Pressure<br>/MPa | Porosity<br>/% | $V_{\text{pore}}$<br>/ $\text{cm}^3 \text{g}^{-1}$ | $S_{\text{BET}}$<br>/ $\text{m}^2 \text{g}^{-1}$ | $V_{\text{t}}$<br>/ $\text{cm}^3 \text{g}^{-1}$ | $D_{\text{meso}}$<br>/nm |
|------------------|----------------|----------------------------------------------------|--------------------------------------------------|-------------------------------------------------|--------------------------|
| 8.0              | 73.3           | 2.5                                                | 74.3                                             | 0.29                                            | 2.16                     |
| 10.0             | 79.9           | 2.5                                                | 83.6                                             | 0.33                                            | 2.28                     |
| 12.0             | 78.1           | 2.8                                                | 90.4                                             | 0.41                                            | 2.41                     |
| 14.0             | 79.6           | 2.9                                                | 94.3                                             | 0.48                                            | 2.49                     |

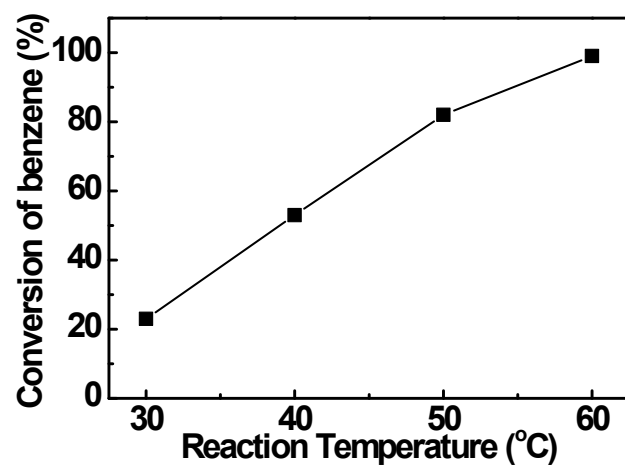

**Fig. S4.** Effect of reaction temperature on the conversion of benzene over Ru/PAM. Reaction conditions: benzene 1.1 mL; benzene/Ru (mol/mol) = 5000; reaction time 2.5 h.
